# Supplementary material
Source: PubMed Central journal article supplement (PMC6086748)
Supplement: NIHMS977196-supplement-8.pdf [file NIHMS977196-supplement-8.pdf]

|                     | pH     | Occupancy (%) |             |          |
|---------------------|--------|---------------|-------------|----------|
|                     |        | High FRET     | Inter. FRET | Low FRET |
| HA*                 | 7      | 75±3%         | 13±2%       | 12±3%    |
| HA*                 | 6.4    | 58±6%         | 18±3%       | 24±4%    |
| HA*                 | 6.1    | 23±4%         | 20±2%       | 57±5%    |
| HA*                 | 5.8    | 22±4%         | 15±3%       | 63±5%    |
| HA*                 | 5.6    | 10±2%         | 12±2%       | 78±3%    |
| HA* + CR9114        | 6.1    | 37±5%         | 26±4%       | 37±3%    |
| HA* + KB2           | 6.1    | 33±6%         | 31±5%       | 36±4%    |
| HA* + liposome/GD1a | 7.5    | 53±4%         | 19±3%       | 28±5%    |
| HA* + liposome/GD1a | 7      | 40±3%         | 17±3%       | 43±4%    |
| HA* + liposome/GD1a | 6.4    | 30±2%         | 18±4%       | 52±3%    |
| HA* + liposome/GD1a | 6.1    | 22±2%         | 19±2%       | 59±2%    |
| HA* + liposome/GD1a | 5.8    | 19±1%         | 16±3%       | 65±2%    |
| HA* + liposome/GD1a | 5.6    | 18±2%         | 12±3%       | 70±1%    |
| HA* + LSTa          | 7.5    | 52±5%         | 22±3%       | 26±3%    |
| HA* + LSTa          | 7      | 50±2%         | 16±2%       | 34±4%    |
| HA* + LSTa          | 6.4    | 39±4%         | 22±4%       | 39±4%    |
| HA* + LSTa          | 6.1    | 33±2%         | 20±2%       | 47±5%    |
| HA* + LSTa          | 5.8    | 23±3%         | 27±4%       | 50±2%    |
| HA* + LSTa          | 5.6    | 13±2%         | 23±3%       | 64±1%    |
| HA* + liposome      | 7.5    | 60±5%         | 26±3%       | 14±4%    |
| HA* + liposome      | 7      | 59±6%         | 21±4%       | 20±5%    |
| HA* + liposome      | 6.4    | 46±3%         | 25±2%       | 29±3%    |
| HA* + liposome      | 6.1    | 19±4%         | 13±2%       | 68±2%    |
| HA* + liposome      | 5.8    | 12±2%         | 17±2%       | 71±3%    |
| HA* + liposome      | 5.6    | 13±1%         | 12±3%       | 75±3%    |
| HA0*                | 7      | 65±5%         | 19±6%       | 16±4%    |
| HA0*                | 6.1    | 41±6%         | 28±5%       | 31±3%    |
| HA0*                | 5.3    | 30±4%         | 35±4%       | 35±6%    |
| HA* G4E             | 7.5    | 13±4%         | 16±5%       | 71±6%    |
| HA* G4E             | 5.6    | 12±4%         | 25±7%       | 63±5%    |
| <b>pH 5.6 → 7.5</b> |        |               |             |          |
| HA*                 | 5 min  | 61±4%         | 19±5%       | 20±4%    |
| HA*                 | 15 min | 52±3%         | 19±2%       | 29±6%    |
| HA*                 | 30 min | 32±4%         | 20±3%       | 48±2%    |
| <b>pH 5.3 → 7.5</b> |        |               |             |          |
| HA*                 | 5 min  | 72±6%         | 15±5%       | 13±3%    |
| HA*                 | 15 min | 57±5%         | 18±4%       | 25±5%    |
| HA*                 | 30 min | 36±6%         | 23±2%       | 41±4%    |
| <b>pH 5.6 → 7.5</b> |        |               |             |          |
| HA*                 | 5 min  | 68±4%         | 16±4%       | 16±6%    |
| HA*                 | 15 min | 45±4%         | 23±6%       | 32±5%    |
| HA*                 | 30 min | 21±5%         | 18±5%       | 61±4%    |
| <b>pH 5.6 → 7.5</b> |        |               |             |          |
| HA* + liposome/GD1a | 5 min  | 27±2%         | 23±3%       | 50±4%    |

|                            |        |       |       |       |
|----------------------------|--------|-------|-------|-------|
| <b>HA* + liposome/GD1a</b> | 30 min | 22±3% | 15±3% | 63±2% |
| <b>pH 5.6 → 7.5</b>        |        |       |       |       |
| <b>HA* + LSTa</b>          | 5 min  | 41±6% | 19±2% | 40±4% |
| <b>HA* + LSTa</b>          | 30 min | 39±5% | 18±2% | 43±5% |
| <b>pH 5.6 → 7.5</b>        |        |       |       |       |
| <b>HA* + liposome</b>      | 5 min  | 15±2% | 16±1% | 59±4% |
| <b>HA* + liposome</b>      | 30 min | 13±1% | 19±2% | 68±6% |

**Table S1 | FRET state occupancies determined through HMM analysis, Related to Figures 2, 4, 5, and 6.**

|                | <b>pH</b> | <b>Lifetime (ns)</b> | <b>Anisotropy</b> |
|----------------|-----------|----------------------|-------------------|
| <b>Cy3</b>     | 7         | 0.72 ± 0.003         | 0.19 ± 0.01       |
| <b>Cy3-HA*</b> | 7         | 1.05 ± 0.004         | 0.13 ± 0.02       |
| <b>Cy5</b>     | 7         | 1.05 ± 0.005         | 0.07 ± 0.01       |
| <b>Cy5-HA*</b> | 7         | 1.57 ± 0.005         | 0.08 ± 0.01       |
| <b>Cy3</b>     | 5.6       | 0.70 ± 0.003         | 0.19 ± 0.02       |
| <b>Cy3-HA*</b> | 5.6       | 1.15 ± 0.004         | 0.12 ± 0.02       |
| <b>Cy5</b>     | 5.6       | 1.09 ± 0.004         | 0.08 ± 0.01       |
| <b>Cy5-HA*</b> | 5.6       | 1.62 ± 0.006         | 0.08 ± 0.01       |

**Table S2 | Fluorescence lifetime and anisotropy of Cy3 and Cy5, Related to Figure 2.**

Virions were produced as described in **STAR Methods**, and labeled with either the Cy3 or Cy5 fluorophore. Measurements were made on a QuantaMaster 400 fluorimeter equipped with a time-correlated single photon counting module (PTI).

|                            | pH  | $k_1$ (sec <sup>-1</sup> ) | $k_{-1}$ (sec <sup>-1</sup> ) | $k_2$ (sec <sup>-1</sup> ) | $k_{-2}$ (sec <sup>-1</sup> ) |
|----------------------------|-----|----------------------------|-------------------------------|----------------------------|-------------------------------|
| <b>HA*</b>                 | 7   | 4.78±0.51                  | 15.33±1.24                    | 5.19±0.73                  | 5.25±0.77                     |
|                            | 6.4 | 6.39±0.58                  | 10.32±0.49                    | 6.19±0.51                  | 4.99±0.26                     |
|                            | 6.1 | 7.95±1.11                  | 8.30±0.44                     | 8.55±0.31                  | 4.87±0.51                     |
|                            | 5.8 | 10.76±2.12                 | 4.87±0.46                     | 11.44±0.81                 | 4.51±0.56                     |
|                            | 5.6 | 11.19±0.37                 | 4.34±0.54                     | 10.73±0.58                 | 4.52±0.27                     |
| <b>HA* + liposome/GD1a</b> |     |                            |                               |                            |                               |
|                            | 7   | 5.20±0.56                  | 10.30±0.95                    | 9.58±0.96                  | 4.87±0.75                     |
|                            | 6.4 | 7.97±0.84                  | 8.36±0.85                     | 8.34±1.02                  | 4.71±0.68                     |
|                            | 6.1 | 9.24±1.03                  | 7.87±1.23                     | 18.47±1.56                 | 4.34±0.48                     |
|                            | 5.8 | 11.24±1.02                 | 7.34±1.03                     | 19.60±1.65                 | 4.23±0.51                     |
|                            | 5.6 | 13.03±0.95                 | 4.45±0.54                     | 20.50±2.05                 | 4.51±0.53                     |

**Table S3 | Rates of transition between the observed FRET states, Related to Figure 7.**

Rate constants were determined by fitting of dwell time histograms to an exponential function (**STAR Methods**). Given the time resolution of imaging of 25 frames/s, according to the Shannon-Nyquist sampling theorem rates greater than 12.5 s<sup>-1</sup> may not have been determined with high accuracy. Errors represent 95% confidence intervals determined during fitting. Rates are defined as in **Figure 7**.
